# Supplementary material for: Molecular Tracking of the Origin of Vesicular Stomatitis Outbreaks in 2004 and 2018, Ecuador
Source: MDPI journal article supplement (doi:10.3390/vetsci10030181), 2023-02-24
Supplement: s1 [file s1]

Supplementary Table S1. Sequences obtained from GenBank NCBI-Nucleotide. The table shows the country of origin of the sample, the serotype, the accession number, the name of the strain and the reference from where it was extracted.

| Location | serotype   | Accession number | Isolate               | State/Province | Reference |
|----------|------------|------------------|-----------------------|----------------|-----------|
| Ecuador  | Indiana    | EF028138.1       | Ind1/Ecuador/04(5)    | Loja           | [16]      |
|          | New Jersey | EF028140.1       | VSV_NJ/Ecuador/85     | No Data        |           |
|          |            | EF028151.1       | NJ/Ecuador/04(33)     | Pichincha      |           |
|          |            | EF028150.1       | VSV_NJ/Ecuador/04(20) | Guayas         |           |
|          |            | EF028149.1       | VSV_NJ/Ecuador/04(19) | Pichincha      |           |
|          |            | EF028148.1       | VSV_NJ/Ecuador/04(18) | Orellana       |           |
|          |            | EF028147.1       | VSV_NJ/Ecuador/04(11) | Los Ríos       |           |
|          |            | EF028146.1       | VSV_NJ/Ecuador/04(10) | Pichincha      |           |
|          |            | EF028145.1       | VSV_NJ/Ecuador/04(9)  | Cotopaxi       |           |
|          |            | EF028144.1       | VSV_NJ/Ecuador/04(8)  | Cotopaxi       |           |
|          |            | EF028143.1       | VSV_NJ/Ecuador/04(6)  | Los Ríos       |           |
|          |            | EF028142.1       | VSV_NJ/Ecuador/04(3)  | Cotopaxi       |           |
|          |            | EF028141.1       | VSV_NJ/Ecuador/04(2)  | Napo           |           |
| Colombia | New Jersey | JX121108.1       | NJ92CLB               | No Data        | [19]      |
|          |            | KU296052.1       | COL/1/93              |                | [22]      |
|          |            | KU296053.1       | 27946/COL/1998        |                |           |

|               |            |            |                     |              |      |
|---------------|------------|------------|---------------------|--------------|------|
|               |            | KU296054.1 | 27775/COL/1998      |              |      |
|               |            | KU296055.1 | 27405/COL/1998      |              |      |
|               |            | KU296056.1 | 29453/COL/2000      |              |      |
|               |            | KU296057.1 | 27879/COL/1998      |              |      |
|               | Indiana    | KU296058.1 | 28336/COL/1999      |              |      |
|               |            | KU296059.1 | 29705/COL/2001      |              |      |
| United States | New Jersey | JX121110.1 | NJ89GAS             | Georgia      | [19] |
|               |            | JX121112.1 | NJ95COB             | Colorado     |      |
|               |            | EF453286.1 | NJ0405NME           | Nuevo Mexico | [22] |
|               |            | EF453235.1 | NJ0905WYB           | Wyoming      |      |
|               |            | EF453237.1 | NJ1005NEB3          | Nebraska     |      |
|               |            | MT094091.1 | NJ0705UTB2          | Utah         | [23] |
|               | Indiana    | MW760857.1 | Texas/18188/2019    | Texas        | [24] |
|               |            | MW760862.1 | Arizona/14629/2020  | Arizona      |      |
|               |            | MW760866.1 | Nebraska/18479/2020 | Nebraska     |      |
| Mexico        | New Jersey | EF453267.1 | NJ04CMB             | Colima       | [25] |
|               |            | EF453306.1 | NJ0803CPB4          | Chiapas      |      |
|               |            | KF772595.1 | NJ1208MHB1          | Michoacan    | [26] |
|               |            | KF772588.1 | NJ1208GRB           | Guerrero     |      |
|               |            | KF772606.1 | NJ1210VCB3          | Veracruz     |      |
|               |            | KF772603.1 | NJ1208TBB           | Tabasco      |      |
|               |            | KF772602.1 | NJ1208OAB           | Oaxaca       |      |
|               |            | KF772581.1 | NJ1207CPB2          | Chiapas      |      |
|               |            | KF772593.1 | NJ1208JAB5          | Jalisco      |      |
| Honduras      | New Jersey | JX121109.2 | NJ1184HDB           | No Data      | [19] |

|            |            |            |                                 |                |      |
|------------|------------|------------|---------------------------------|----------------|------|
|            |            | M31875.1   | 12/82-HD-B                      |                | [27] |
|            |            | M31876.1   | 10/85-HD-B1                     |                |      |
|            |            | M31871.1   | 11/84-HD-B1                     |                |      |
|            |            | M31872.1   | 09/82-HD-B                      |                |      |
|            | Indiana    | MK934320.1 | Hon83B/L-2-83                   |                | [28] |
| Brazil     | Indiana    | JF795529.1 | VSIV-386AgulhasNegrasB          | Agulhas negras | [29] |
|            |            | JF795530.1 | VSIV-3 95Minas GeraisB          | Minas Gerais   |      |
|            |            | JF795528.1 | VSIV-3 77EspinosaB              | Espinoza       |      |
|            |            | JF795527.1 | VSIV-2 98Sta CatarinaB2         | Santa Catarina |      |
|            |            | JF795525.1 | VSIV-2 98ParanaE                | Parana         |      |
|            |            | JF795523.1 | VSIV-2 79RiberaoE               | Riberao        |      |
|            |            | KJ746669.1 | VSIV-3<br>2013SaoBento/ParaibaE | Sao Bento      | [20] |
|            |            | KJ746668.1 | VSIV-3<br>2013Paulista/ParaibaB | Paulista       |      |
| Panama     | New Jersey | M31878.1   | 01/85-PN-B1                     | No Data        | [27] |
|            |            | M31879.1   | ../60-PN-B                      |                | [21] |
|            |            | L24975.1   | 12/83PNB                        |                |      |
|            |            | L24964.1   | 10/83PNB                        |                | [27] |
| Costa Rica | New Jersey | M31874.1   | 10/82-CR-B                      |                |      |
|            | Indiana    | EF028137.1 | Ind1/Costa_Rica/79              |                | [16] |
|            |            | EF028134.1 | Ind1/Costa_Rica/72              |                |      |

|             |            |            |                     |              |      |
|-------------|------------|------------|---------------------|--------------|------|
| Nicaragua   | New Jersey | M31877.1   | 07/83-NC-P          |              | [27] |
|             |            | L24971.1   | 11/83NCB            |              | [21] |
| Guatemala   |            | M31870.1   | 10/84-GM-P          |              | [27] |
| Argentina   | Indiana    | JF795524.1 | VSIV-2 86MaipuE     | Buenos Aires | [29] |
|             |            | JF795521.1 | VSIV-2 63SaltoE     | Buenos Aires |      |
| El Salvador |            | EF028136.1 | Ind1/El_Salvador/78 | No Data      | [16] |
|             |            | EF028135.1 | Ind1/El_Salvador/71 |              |      |

Supplementary Table S2. ID of the virus samples from the 2018 outbreak, the GenBank accession number, geographic origin in Ecuador, month of isolation and serotype.

| Sample ID | Accession number | Serotype   | Isolation Month | Province   | Canton       | Parish                      |
|-----------|------------------|------------|-----------------|------------|--------------|-----------------------------|
| 6430      | ON567144         | New Jersey | October         | Carchi     | Mira         | Juan Montalvo               |
| 9084      | ON567167         | New Jersey | November        | Carchi     | Montufar     | La Paz                      |
| 9095      | ON567169         | New Jersey | November        | Carchi     | Espejo       | San Isidro                  |
| 6302      | ON567142         | New Jersey | October         | Carchi     | Mira         | Juan Montalvo               |
| 3347      | ON567121         | New Jersey | July            | Cotopaxi   | Pujilí       | Pujilí                      |
| 5709      | ON567140         | New Jersey | September       | Cotopaxi   | Sigchos      | Palo Quemado                |
| 4918      | ON567127         | New Jersey | August          | Esmeraldas | Quinindé     | Malimpia                    |
| 1204      | ON567116         | New Jersey | March           | Guayas     | Balao        | Balao                       |
| 1499      | ON567117         | New Jersey | April           | Guayas     | Balao        | Balao                       |
| 6568      | ON567146         | New Jersey | October         | Imbabura   | Antonio Ante | Imbaya                      |
| 6338      | ON567143         | New Jersey | October         | Imbabura   | Ibarra       | Salinas                     |
| 6592      | ON567148         | New Jersey | October         | Imbabura   | Urcuquí      | Tumbabiro                   |
| 6567      | ON567145         | New Jersey | October         | Imbabura   | Antonio Ante | Imbaya                      |
| 8785      | ON567156         | New Jersey | October         | Imbabura   | Urcuquí      | San Blas                    |
| 8765      | ON567154         | New Jersey | October         | Imbabura   | Ibarra       | Lita                        |
| 8908      | ON567162         | New Jersey | October         | Imbabura   | Pimampiro    | San Francisco de Sigsipamba |
| 8825      | ON567160         | New Jersey | October         | Imbabura   | Urcuquí      | San Blas                    |

|      |          |            |           |                 |                             |                             |
|------|----------|------------|-----------|-----------------|-----------------------------|-----------------------------|
| 8764 | ON567153 | New Jersey | October   | Imbabura        | Pimampiro                   | San Francisco de Sigsipamba |
| 8774 | ON567155 | New Jersey | October   | Imbabura        | Pimampiro                   | Chuga                       |
| 8798 | ON567157 | New Jersey | October   | Imbabura        | Cotacachi                   | Sagrario                    |
| 8881 | ON567161 | New Jersey | October   | Imbabura        | Pimampiro                   | Pimampiro                   |
| 9132 | ON567170 | New Jersey | November  | Imbabura        | Urcuquí                     | San Blas                    |
| 8992 | ON567165 | New Jersey | November  | Imbabura        | Urcuquí                     | Buenos Aires                |
| 8921 | ON567163 | New Jersey | October   | Imbabura        | Cotacachi                   | Imantag                     |
| 6597 | ON567149 | New Jersey | October   | Imbabura        | Urcuquí                     | Pablo Salinas               |
| 2623 | ON567119 | New Jersey | July      | Los Ríos        | Montalvo                    | Montalvo                    |
| 8789 | ON567158 | New Jersey | October   | Morona Santiago | Morona                      | Sevilla Don Bosco           |
| 111  | ON567115 | New Jersey | January   | Napo            | Tena                        | Tena                        |
| 8812 | ON567159 | New Jersey | October   | Napo            | Tena                        | Puerto Napo                 |
| 8994 | ON567166 | New Jersey | November  | Napo            | Tena                        | Tena                        |
| 9425 | ON567175 | New Jersey | November  | Napo            | Archidona                   | Cotundo                     |
| 9073 | ON567168 | New Jersey | November  | Napo            | Carlos Julio Arosemena Tola | Carlos Julio Arosemena Tola |
| 9422 | ON567174 | New Jersey | November  | Orellana        | Francisco De Orellana       | Guayusa                     |
| 9678 | ON567177 | New Jersey | December  | Orellana        | Francisco De Orellana       | Nuevo Paraíso               |
| 8922 | ON567164 | New Jersey | October   | Orellana        | Francisco De Orellana       | No Informa                  |
| 9814 | ON567113 | Indiana    | December  | Orellana        | Loreto                      | San José De Payamino        |
| 6601 | ON567150 | New Jersey | October   | Pastaza         | Pastaza                     | Simón Bolívar               |
| 6602 | ON567151 | New Jersey | October   | Pastaza         | Pastaza                     | Simón Bolívar               |
| 1785 | ON567111 | Indiana    | April     | Pichincha       | Pedro Vicente Maldonado     | Pedro Vicente Maldonado     |
| 4714 | ON567125 | New Jersey | August    | Pichincha       | Puerto Quito                | Puerto Quito                |
| 5417 | ON567138 | New Jersey | September | Pichincha       | Quito                       | Lloa                        |
| 5156 | ON567136 | New Jersey | August    | Pichincha       | Pedro Vicente Maldonado     | No Informa                  |
| 5710 | ON567141 | New Jersey | September | Pichincha       | Pedro Vicente Maldonado     | Pedro Vicente Maldonado     |
| 9421 | ON567173 | New Jersey | November  | Pichincha       | Cayambe                     | Cusubamba                   |

|      |          |            |           |                                |               |                        |
|------|----------|------------|-----------|--------------------------------|---------------|------------------------|
| 2482 | ON567112 | Indiana    | June      | Santo Domingo de los Tsáchilas | Santo Domingo | Valle Hermoso          |
| 3277 | ON567120 | New Jersey | July      | Santo Domingo de los Tsáchilas | Santo Domingo | Santa María Del Toachi |
| 4222 | ON567122 | New Jersey | August    | Santo Domingo de los Tsáchilas | Santo Domingo | El Esfuerzo            |
| 4945 | ON567129 | New Jersey | August    | Santo Domingo de los Tsáchilas | Santo Domingo | Alluriquín             |
| 4393 | ON567123 | New Jersey | August    | Santo Domingo de los Tsáchilas | Santo Domingo | Las Mercedes           |
| 4498 | ON567124 | New Jersey | August    | Santo Domingo de los Tsáchilas | Santo Domingo | Río Verde              |
| 5128 | ON567134 | New Jersey | August    | Santo Domingo de los Tsáchilas | Santo Domingo | Las Mercedes           |
| 5126 | ON567133 | New Jersey | August    | Santo Domingo de los Tsáchilas | Santo Domingo | Las Mercedes           |
| 5122 | ON567130 | New Jersey | August    | Santo Domingo de los Tsáchilas | Santo Domingo | Las Mercedes           |
| 5124 | ON567131 | New Jersey | August    | Santo Domingo de los Tsáchilas | Santo Domingo | Las Mercedes           |
| 5129 | ON567135 | New Jersey | August    | Santo Domingo de los Tsáchilas | La Concordia  | La Concordia           |
| 9639 | ON567176 | New Jersey | December  | Santo Domingo de los Tsáchilas | Santo Domingo | Luz De América         |
| 4870 | ON567126 | New Jersey | August    | Santo Domingo de los Tsáchilas | Santo Domingo | Alluriquín             |
| 5284 | ON567137 | New Jersey | August    | Santo Domingo de los Tsáchilas | Santo Domingo | Puerto Limón           |
| 5125 | ON567132 | New Jersey | August    | Santo Domingo de los Tsáchilas | Santo Domingo | Las Mercedes           |
| 5639 | ON567139 | New Jersey | September | Santo Domingo de los Tsáchilas | Santo Domingo | Alluriquín             |

|      |          |                      |          |                                |               |                 |
|------|----------|----------------------|----------|--------------------------------|---------------|-----------------|
| 4942 | ON567128 | New Jersey           | August   | Santo Domingo de los Tsáchilas | Santo Domingo | Las Mercedes    |
| 952  | ON567114 | New Jersey - Indiana | February | Sucumbíos                      | Cascales      | Dorado Cascales |
| 1992 | ON567118 | New Jersey           | May      | Zamora Chinchipe               | Yantzaza      | Yantzaza        |
| 9263 | ON567171 | New Jersey           | November | Zamora Chinchipe               | Chinchipe     | Zumba           |
| 9356 | ON567172 | New Jersey - Indiana | November | Zamora Chinchipe               | El Panguí     | El Panguí       |

Supplementary Table S3. Haplotypes, and sample origin.

| Country    | State/Province                 | Haplotype                      |
|------------|--------------------------------|--------------------------------|
| Colombia   |                                | Hap_1, Hap_2, Hap_3, Hap_4     |
| Costa Rica |                                | Hap_5                          |
| Ecuador    | Carchi                         | Hap_30                         |
|            | Cotopaxi                       | Hap_6, Hap_30                  |
|            | Esmeraldas                     | Hap_32                         |
|            | Guayas                         | Hap_6, Hap_29                  |
|            | Imbabura                       | Hap_30, Hap_33, Hap_34, Hap_36 |
|            | Los Rios                       | Hap_6, Hap_8, Hap_30           |
|            | Morona Santiago                | Hap_35                         |
|            | Napo                           | Hap_7, Hap_28, Hap_30          |
|            | Orellana                       | Hap_9, Hap_28, Hap_38          |
|            | Pastaza                        | Hap_28                         |
|            | Pichincha                      | Hap_4, Hap_6, Hap_30           |
|            | Santo Domingo de los Tsachilas | Hap_30, Hap_31, Hap_37         |
|            | Sucumbios                      | Hap_27                         |
|            | Zamora Chinchipe               | Hap_28                         |
| Guatemala  |                                | Hap_20                         |
| Honduras   |                                | Hap_11, Hap_22, Hap_25, Hap_26 |
| Mexico     | Chiapas                        | Hap_24                         |
|            | Colima                         | Hap_10                         |
|            | Guerrero                       | Hap_17                         |
|            | Jalisco                        | Hap_19                         |
|            | Michoacan                      | Hap_19                         |
|            | Oaxaca                         | Hap_21                         |
|            | Tabasco                        | Hap_21                         |
|            | Veracruz                       | Hap_15                         |
| Nicaragua  |                                | Hap_13, Hap_16                 |

|                             |              |                |
|-----------------------------|--------------|----------------|
| Panama                      |              | Hap_18, Hap_23 |
| United States<br>of America | Colorado     | Hap_14         |
|                             | Georgia      | Hap_12         |
|                             | Nebraska     | Hap_10         |
|                             | Nuevo Mexico | Hap_10         |
|                             | Utah         | Hap_10         |
|                             | Wyomin       | Hap_10         |
